# Supplementary material for: Bimetallic ZnCo-MOF derived porous Ir-doped cobalt oxides for water oxidation with improved activity and stability
Source: Royal Society of Chemistry journal article supplement (doi:10.1039/d4qi01022a), 2024-01-01
Supplement: d4qi01022a1.pdf [file d4qi01022a1.pdf]

## Supporting Information

### **Bimetallic ZnCo-MOF derived porous Ir-doped cobalt oxides for water oxidation with improved activity and stability**

Junliang Chen, Jie Liu, Shaojie Xu, Yi Wu, Yunan Ye and Jinjie Qian\*

Key Laboratory of Carbon Materials of Zhejiang Province, College of Chemistry and Materials Engineering, Wenzhou University, Wenzhou 325035, Zhejiang, P. R. China

\*Corresponding author

E-mail: jinjieqian@wzu.edu.cn (J. Qian)

## Experimental Section

### Chemicals and Reagents

All chemicals are purchased and used without further purification. Cobalt(II) acetate tetrahydrate ( $\text{Co}(\text{CH}_3\text{COO})_2 \cdot 4\text{H}_2\text{O}$ , AR), zinc acetate dihydrate ( $\text{Zn}(\text{CH}_3\text{COO})_2 \cdot 2\text{H}_2\text{O}$ , AR), 2-methylimidazole (2-HMeIm, AR, 99%), sodium hydroxide (NaOH, 95%), iridium trichloride hydrate ( $\text{IrCl}_3 \cdot x\text{H}_2\text{O}$ , AR), and ethanol (EtOH, moisture content  $\leq 0.3\%$  and  $\leq 0.1\%$ ) are purchased from Shanghai Aladdin Corporation. 5 wt% Nafion ionomers are purchased from Aldrich. All the salts, solvents and other reagents are of analytical grade. High-purity  $\text{N}_2$ , Ar gases, and deionized water (18.2 M $\Omega$ ) are used in all experiments.

### Synthesis of ZIF-ZnCo-n (n = 1-4) series, ZIF-Zn and ZIF-Co

7.5 g 2-methylimidazole (2-MI) was first dissolved into 50 mL deionized water with stirring in 400 rpm. Then 12 mmol mixture of  $\text{Co}(\text{CH}_3\text{COO})_2 \cdot 4\text{H}_2\text{O}$  and  $\text{Zn}(\text{CH}_3\text{COO})_2 \cdot 2\text{H}_2\text{O}$  (mol% of Zn was in 10, 30, 50, 70, respectively) was added into the above solution and keep agitating for 30 min. After that, the obtained solution was kept in room temperature without stirring for 12 h. Finally, the powder was collected by centrifugation and washed with water and ethanol to remove residual 2-IM and unreacted metal cations. (The obtained samples are denoted as ZIF-ZnCo-1, ZIF-ZnCo-2, ZIF-ZnCo-3, ZIF-ZnCo-4, respectively). The ZIF-Zn and ZIF-Co were synthesized with the same method except for adding Co/Zn salt, respectively.

### **Synthesis of ZCO-n (n = 1-4) series, CO and ZO**

The as-prepared ZIF-ZnCo-n series, ZIF-Co and ZIF-Zn were weighted and placed in the muffle furnace. Then the temperature was set to 300 °C at a heating rate of 5 °C min<sup>-1</sup> in air atmosphere and maintained for 6 h. The black powder was obtained after cooling to room temperature, denoted as ZCO-1, ZCO-2, ZCO-3, ZCO-4 and CO. Additionally, the obtained white powder derived from ZIF-Zn was denoted as ZO.

### **Synthesis of pZCO-n (n = 1-4) series**

The ZCO-n series and CO (50 mg) were soaked in the NaOH solution (2 M, 20 mL) and stirring for 30 min. After that, the powder was collected by centrifugation and washed with water to remove residual NaOH. The obtained samples were named as pZCO-1, pZCO-2, pZCO-3, pZCO-4 and pCO respectively.

### **Synthesis of Ir-pZCO**

The pZCO-3 (10 mg) was first dispersed homogeneously in 10 mL deionized water. Then 1 mg IrCl<sub>3</sub>·xH<sub>2</sub>O was added into the above solution, which was subsequently kept at 60 °C for 9 h under stirring in 600 rpm. After that, the powder was collected by centrifugation and washed with water to remove unreacted metal cations. Moreover, the obtained sample was annealed in the muffle furnace at 250 °C with a heating rate of 5 °C min<sup>-1</sup> in air atmosphere and maintained for 1 h. The final material was named as Ir-pZCO.

### **Etching condition exploration**

A series of NaOH solutions with different concentrations (0.1 M, 0.2 M, 0.5 M, 1.0 M, 2.0 M) were first prepared and transferred 5 mL into 20 mL glass bottle. Then, the as-prepared ZO (20 mg) was added into the above solutions with stirring at different temperatures and reacted for certain time. The relative photographs were shown below in **Figure S1**.

### **Material Characterization**

The morphology of the samples is analyzed using a Nova NanoSEM 200 scanning electron microscope (FE-SEM, FEI Inc.). N<sub>2</sub> adsorption study is measured in the Specific Surface Area & Pore Size Analyzer (BSD-PS1, Beishide Instrument Technology (Beijing) Co., Ltd.)), where the samples after the activation of the high temperatures are placed in a clean ultra-high vacuum system and the cryogenic temperature of 77 K. The structure and properties are characterized using transmission electron microscopy (TEM, JEOL JEM-2100F microscope), as well as the high-resolution transmission electron microscope (HR-TEM) image and energy Dispersive X-ray spectroscopy (EDS) pattern. Powder X-ray diffraction (PXRD) maps of the products were acquired on a Bruker (Karlsruhe, Germany) D8 Advance powder diffractometer at room temperature, operating at 40 kV, 40 mA, graphite monochromated Cu K $\alpha$  radiation ( $\lambda = 1.54 \text{ \AA}$ ). X-ray photoelectron spectroscopy (XPS) is conducted on PHI 5000 VersaProbe III. The loading Ir content was detected by inductively coupled plasma optical emission spectroscopy (ICP-OES; NeexION 2000)

### **Electrochemical measurements**

The electrochemical experiments are carried out at room temperature using a CHI 760E electrochemical station for OER. The experiment used the electrodes of Hg/HgO and platinum net are sequentially behaved as the reference (RE) and counter electrodes (CE), which are used in 1.0 M KOH electrolyte solution. According to a formula  $E_{\text{RHE}} = E_{\text{SCE}} + 0.098 \text{ V} + 0.059 \text{ V} \times \text{pH} = E_{\text{SCE}} + 0.912$ , all of its potentials can be corrected to reversible hydrogen electrode (RHE) potentials. The catalyst powder (5 mg) is dispersed in a mixture solution of 500  $\mu\text{L}$  (300  $\mu\text{L}$  EtOH, 150  $\mu\text{L}$  deionized water, and 50  $\mu\text{L}$  5 wt % Nafion solution) and ultrasonicated for 2 h to form a homogeneous catalyst ink. Thereafter, the surface of glassy carbon (diameter: 3 mm) is loaded with 5  $\mu\text{L}$  of a catalyst ink, wherein 0.7  $\text{mg cm}^{-2}$  is calculated the loading amount. Linear sweep voltammetry (LSV) is conducted in electrolyte solution without correction (a scan rate: 5  $\text{mV s}^{-1}$ ). The Tafel slope is transferred according to Tafel equation as follows:  $\eta = b \times \log(j / j_0)$ . Regarding the evaluation of the electrochemical active surface areas (ECSA) of the samples, CV has also been performed by measuring the double-layer capacitances ( $C_{\text{dl}}$ ) with various scan rates (20, 40, 60, 80, 100 and 120  $\text{mV s}^{-1}$ ) under the potential window of 1.05 - 1.15 V vs. RHE. The Nyquist plots of EIS are collected from  $10^6$  Hz to 0.01 Hz with an amplitude of 5 mV at 1.6 V vs. RHE in 1.0 M KOH. For evaluating the long-term performance, the electrochemical stability of the Ir-pZCO is conducted at a constant overpotential of 1.53 V for achieving a high initial current density. In order to calculate the electron transfer number (N), rotating ring-disk electrode (RRDE) voltammogram of as-prepared samples are conducted to collect disk current ( $I_{\text{disk}}$ ) and ring current ( $I_{\text{ring}}$ ) at the same time, equation as follows:  $N=4 \times I_{\text{d}} / (I_{\text{d}}$

+  $I_r / N_c$ ), where  $I_r$  is the ring current,  $I_d$  is the disk current, and  $N_c$  is the current collection efficiency. The Faradaic efficiency ( $\epsilon$ ) is calculated by the equation as follows:  $\epsilon = I_r / (I_d \cdot N_c)$ .

### Density functional theory

The density functional theory was used to carry out all the calculations with the Perdew-Burke-Ernzerh exchange-correlation functional of generalized gradient approximation and the projector-augmented wave method, which was implemented through Vienna Ab-initio Simulation Package (VASP). The input model structure file was created by VESTA.<sup>1</sup> The plane wave-basis expansion cutoff energy was fixed at 500 eV, and atomic relaxation was conducted until the force exerted on atoms was less than 0.02 eV  $\text{\AA}^{-1}$  and energy was concurrently converged to  $1 \times 10^{-5}$  eV. The k-point was a Monkhorst-Pack of  $3 \times 3 \times 1$ .

The Gibbs free energy change ( $\Delta G$ ) of each lithiation step was defined as:

$$\Delta G = \Delta E + \Delta ZPE - T\Delta S,$$

where  $\Delta E$  is the electronic energy difference directly obtained from DFT calculations,  $\Delta ZPE$  is the change in zero-point energy,  $T$  is the temperature ( $T = 298.15$  K) and  $\Delta S$  is the change in the entropy, respectively.<sup>2</sup> The zero-point energy and entropy were obtained through vibrational frequencies.

Conventionally, in an alkaline electrolyte, the anode reactions after oxygen adsorption can be written as:

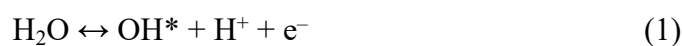

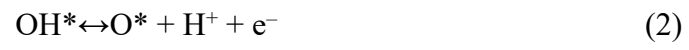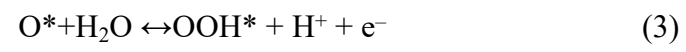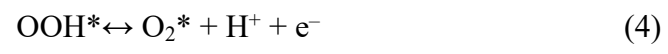

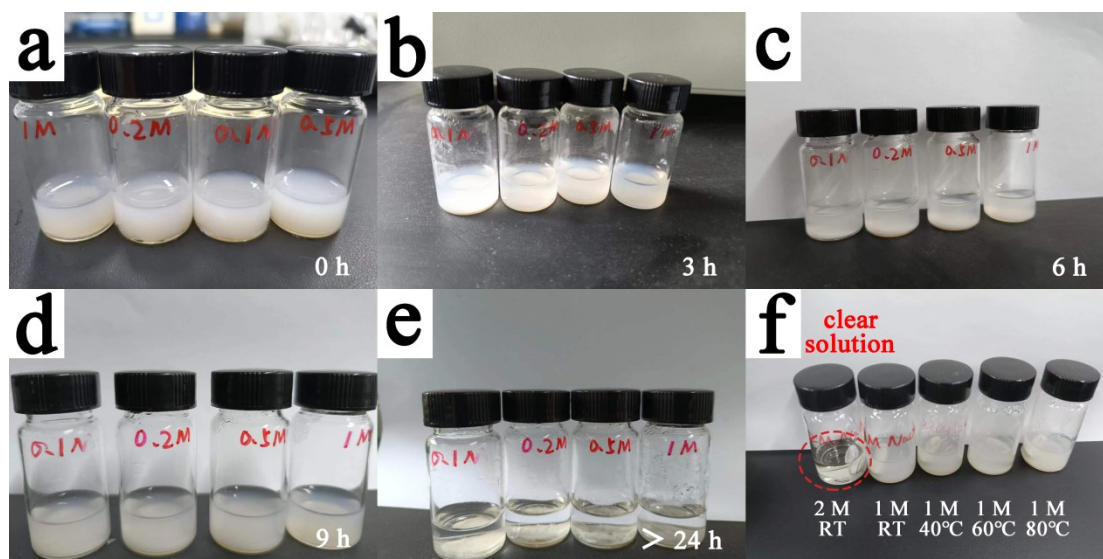

**Figure S1.** The photographs of pure ZnO with base-etching process. (a-e) The ZnO immersed in NaOH solutions with various concentrations (marked on bottle) and reacted at room temperature (RT) for 0 h, 3 h, 6 h, 9 h and > 24 h, respectively. (f) The ZnO immersed in NaOH solutions with various concentrations and reacted at different temperatures (marked in photo) for 0.5 h.

It could be obviously observed that when the concentration was lower than 2.0 M (0.1 M, 0.2 M, 0.5 M, 1.0 M), the ZnO particles were not able to fully dissolve, no matter at what temperature. However, when applied with 2.0 M NaOH, the ZnO rapidly dissolved and formed a clear solution. Therefore, the optimized concentration of 2.0 M NaOH solution was selected for subsequent etching process.



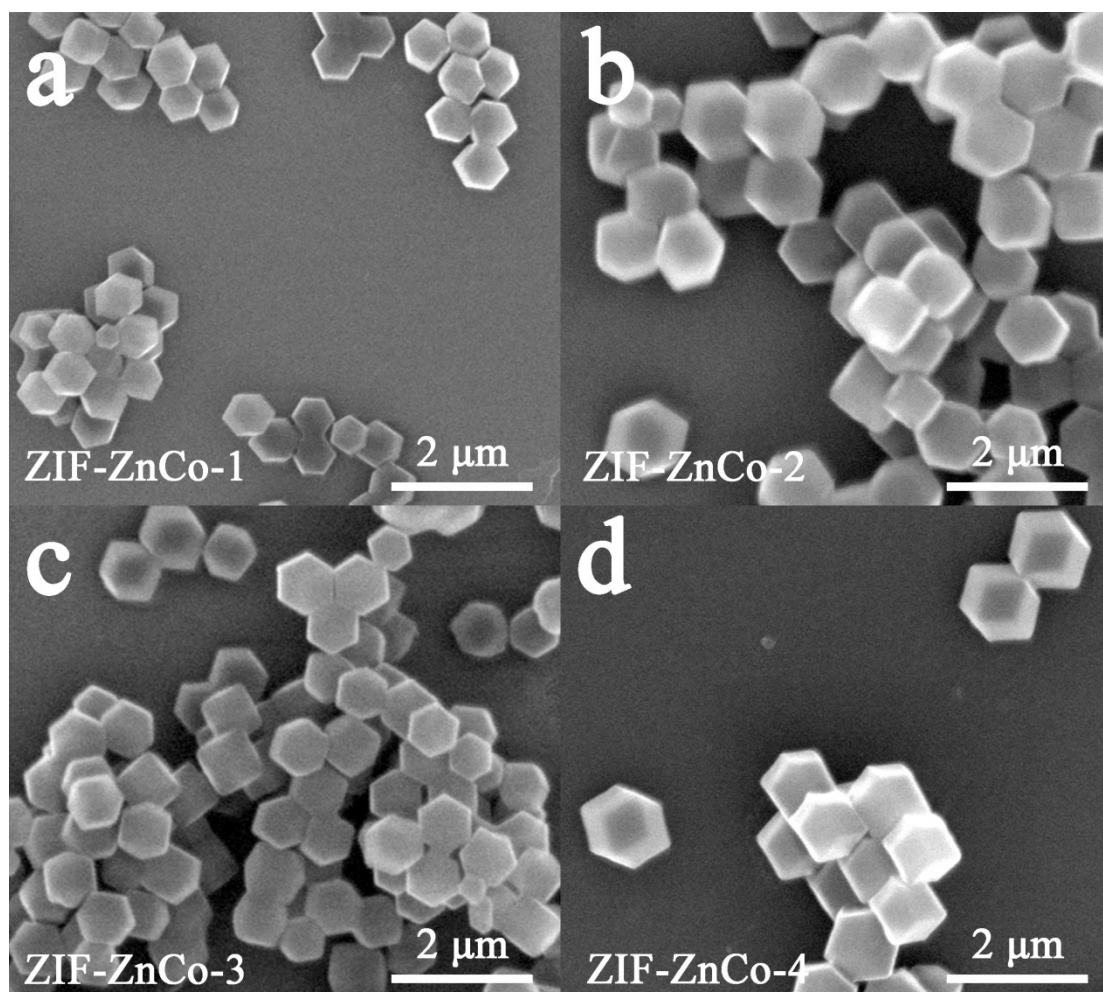

**Figure S2.** The SEM images of (a-d) ZIF-ZnCo-1/2/3/4 with various Zn concentrations.

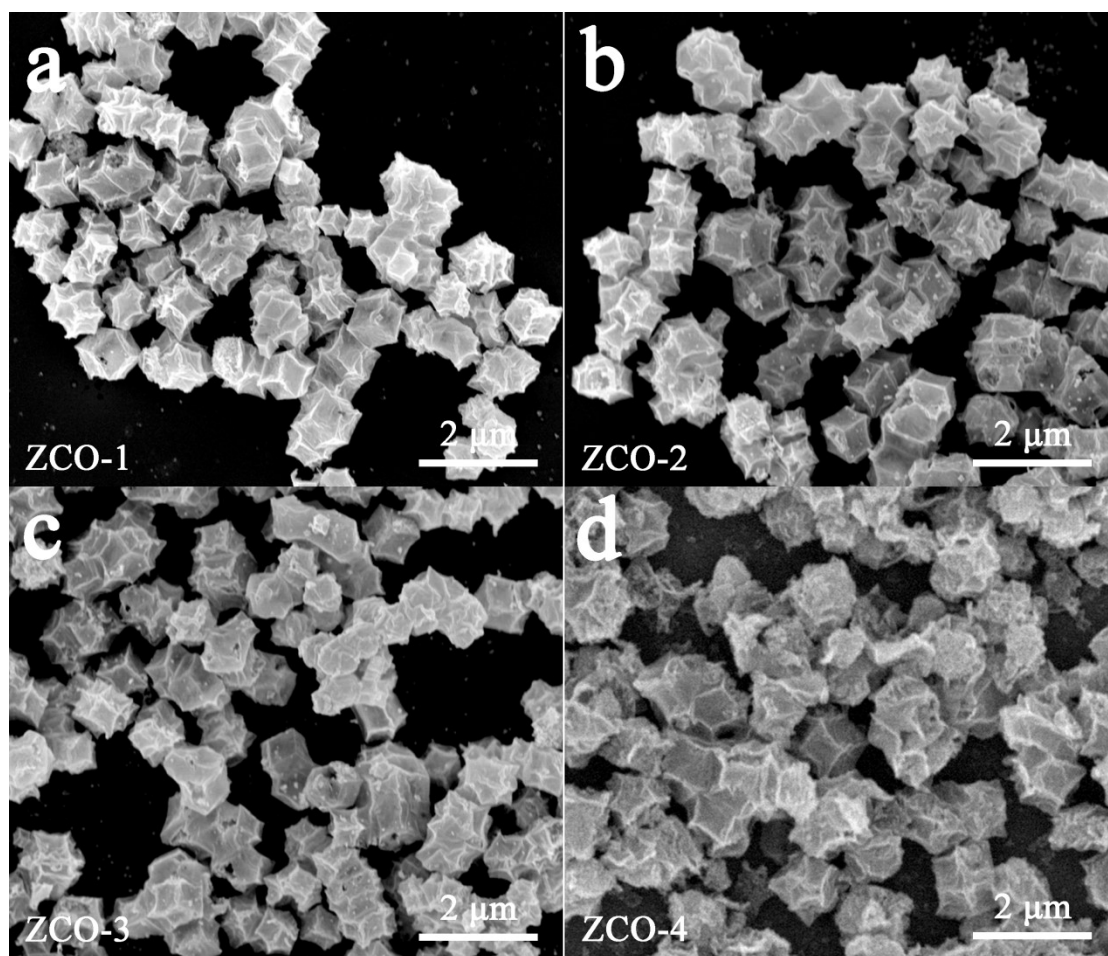

**Figure S3.** The SEM images of (a-d) ZCO-1/2/3/4 calcined from ZIF-ZnCo-1/2/3/4 precursors.

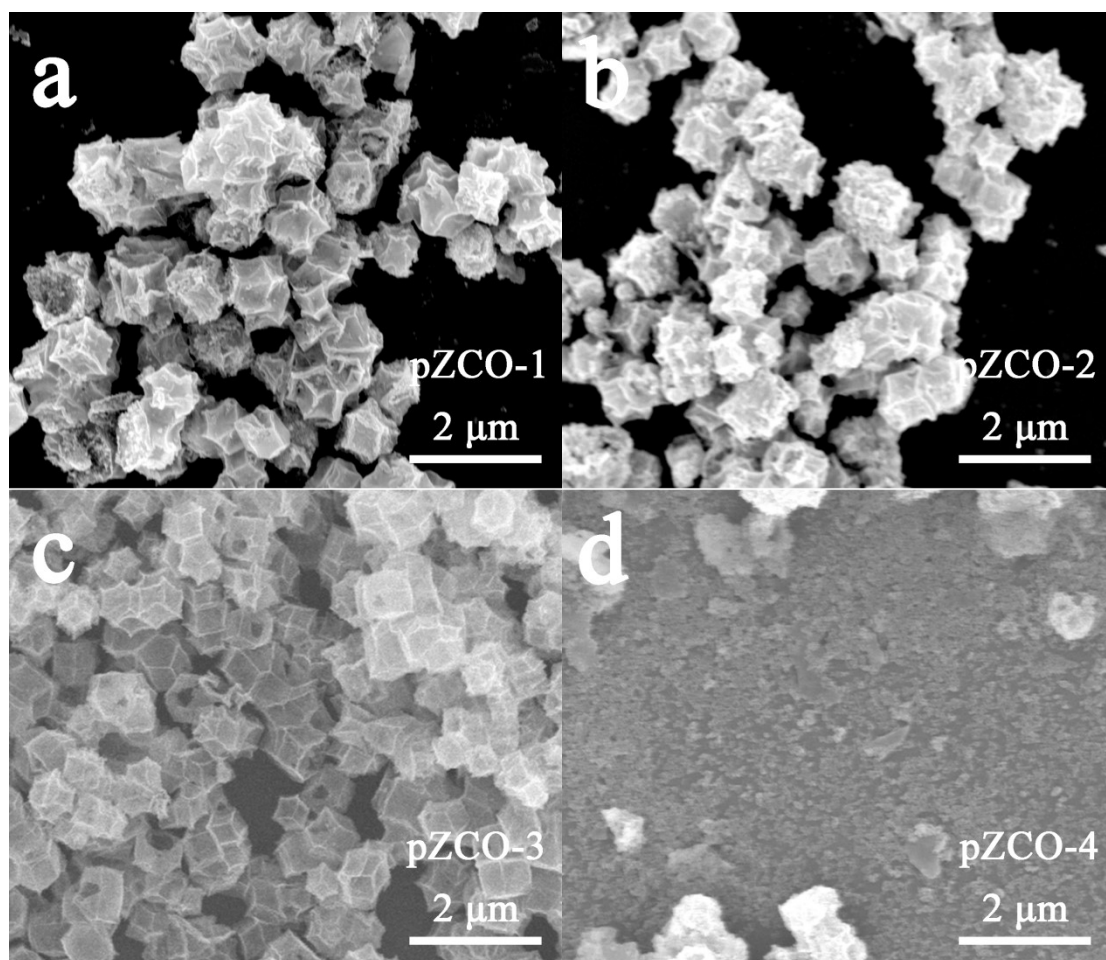

**Figure S4.** The SEM images of (a-d) pZCO-1/2/3/4 base-etched from ZCO-1/2/3/4 precursors.

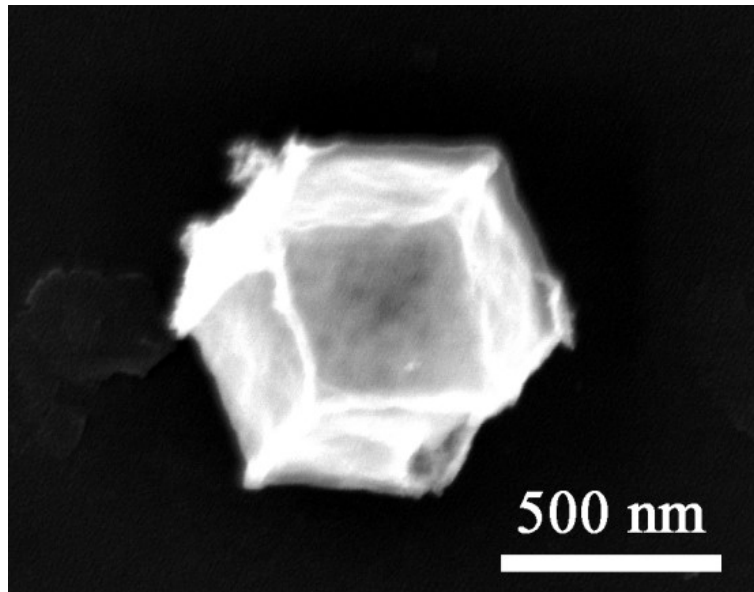

**Figure S5.** The SEM images of pCO.

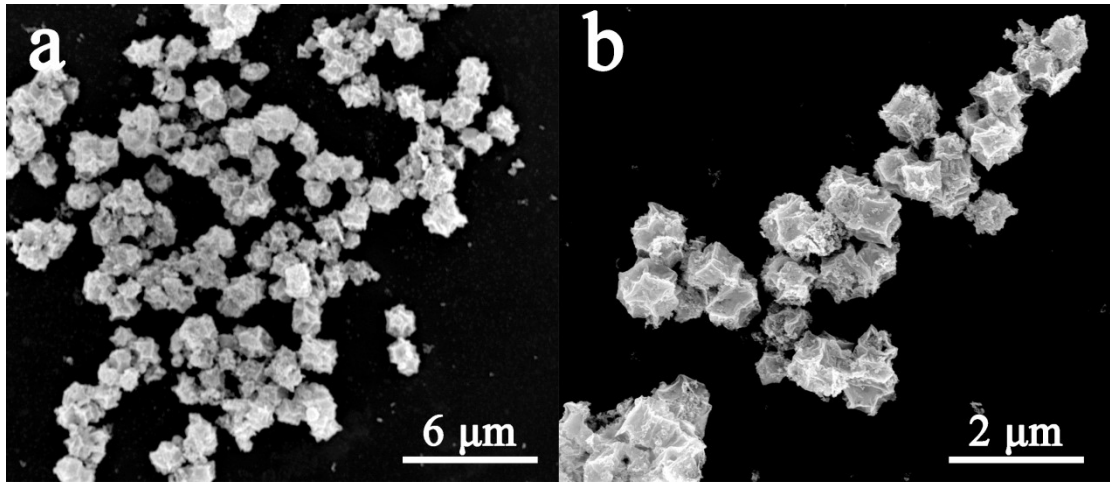

**Figure S6.** The SEM images of Ir-pZCO.

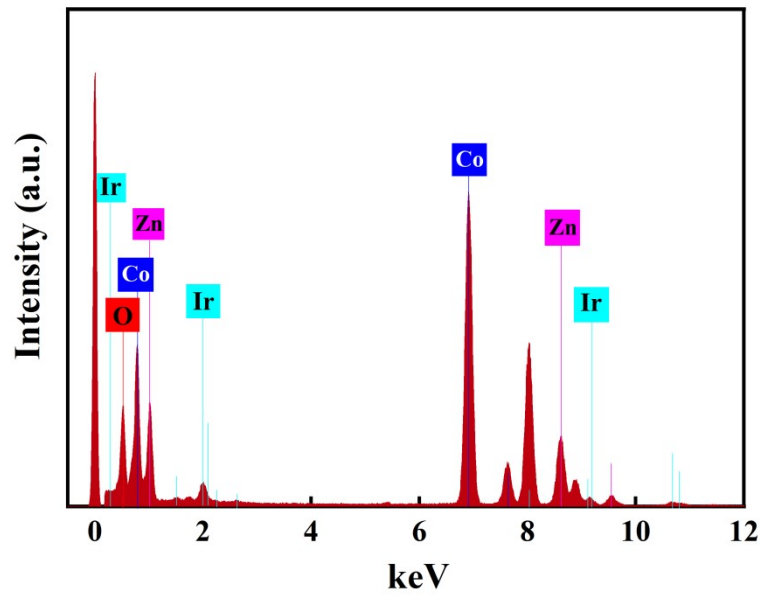

**Figure S7.** The EDS pattern of Ir-pZCO.

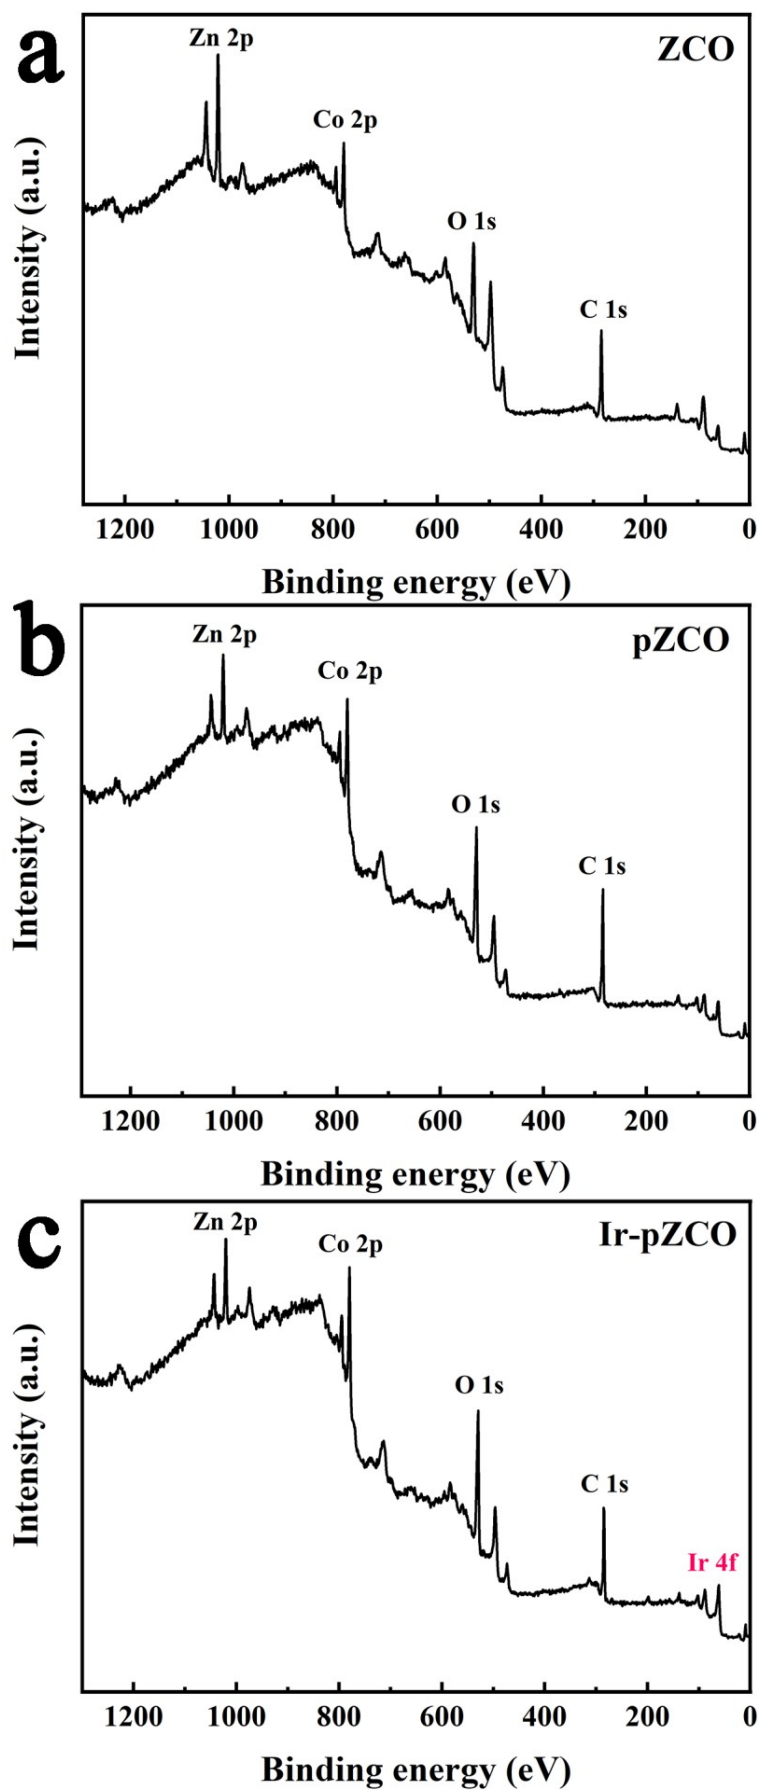

**Figure S8.** The full survey XPS spectra of (a) ZCO, (b) pZCO and (c) Ir-pZCO.

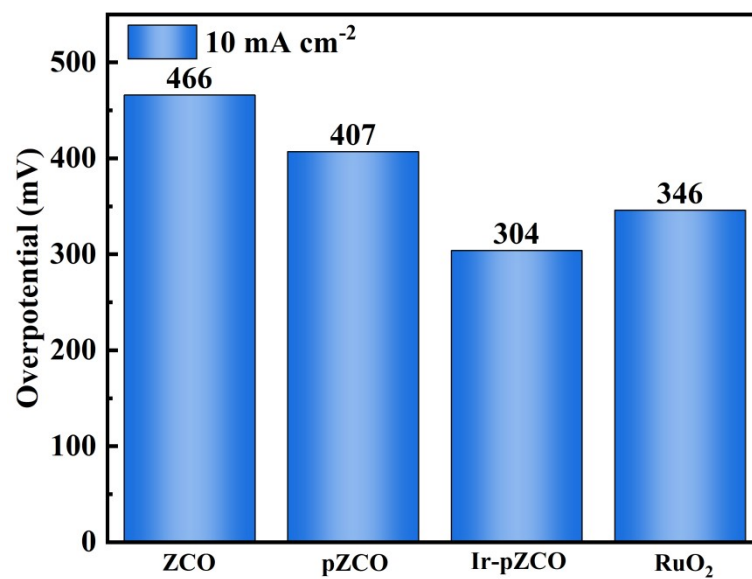

**Figure S9.** A summary of overpotentials of ZCO, pZCO, Ir-pZCO and RuO<sub>2</sub> at 10 mA cm<sup>-2</sup>



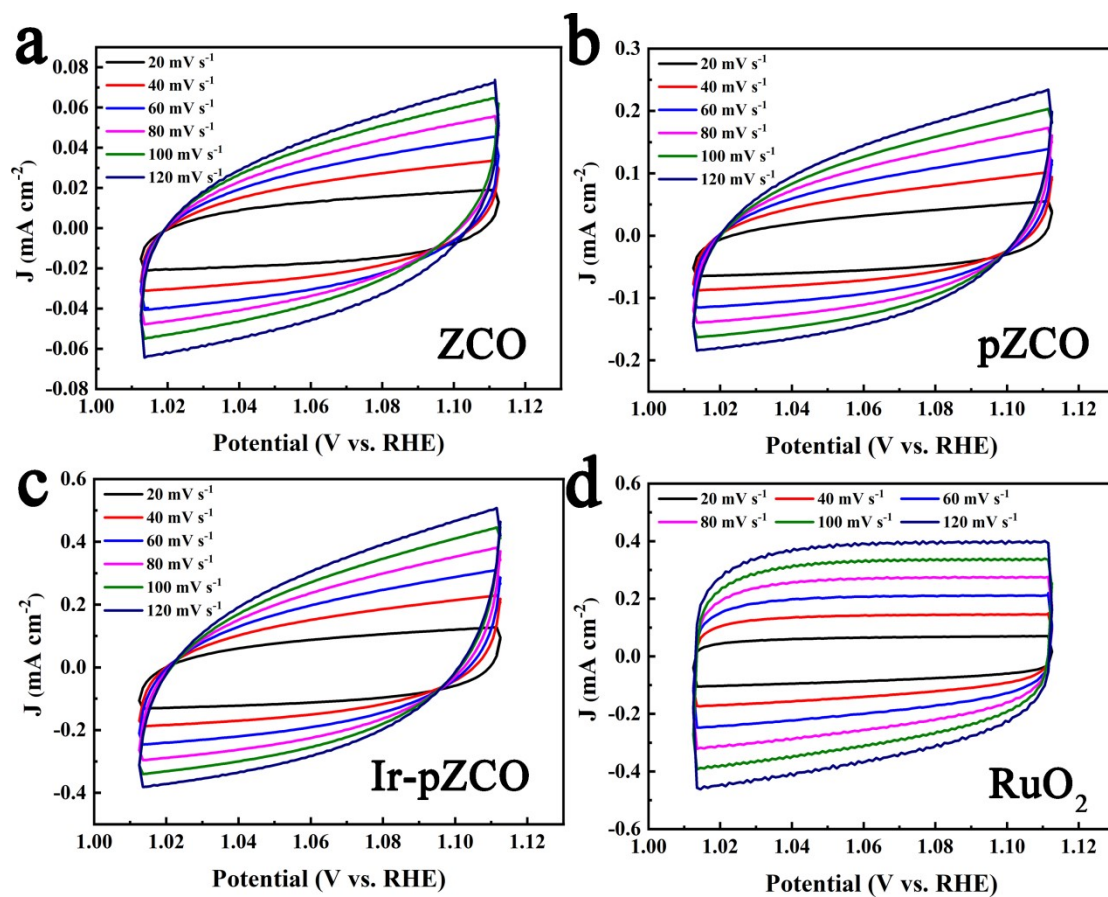

**Figure S10.** CV curves from 20 to 120  $\text{mV s}^{-1}$  for (a) ZCO, (b) pZCO, (c) Ir-pZCO, and (d)  $\text{RuO}_2$  in 1.0 M KOH.

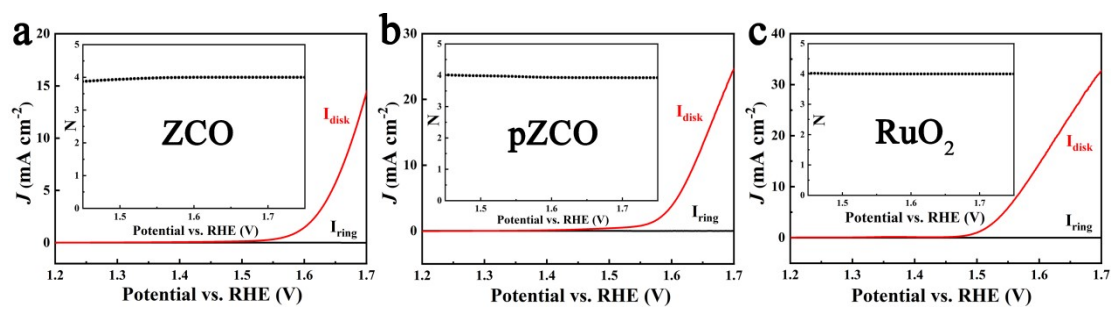

**Figure S11.** RRDE LSV curves of (a) ZCO, (b) pZCO and (c) RuO<sub>2</sub>.

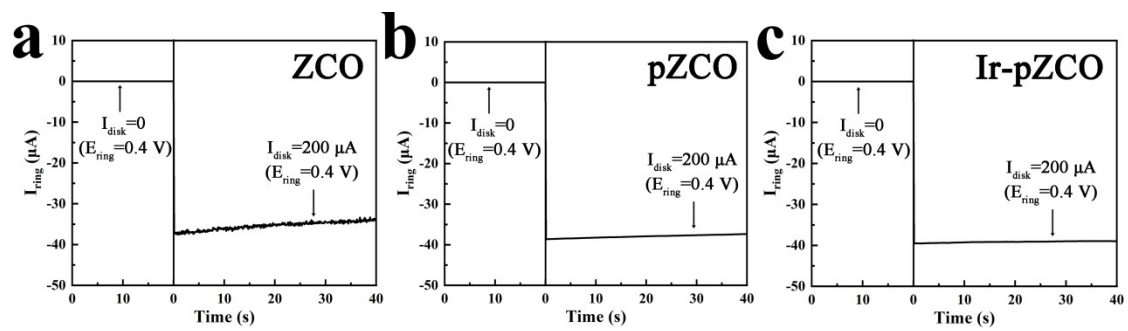

**Figure S12.** (a-c) the time-dependent ring current of ZCO, pZCO and Ir-pZCO via

RRDE technique.

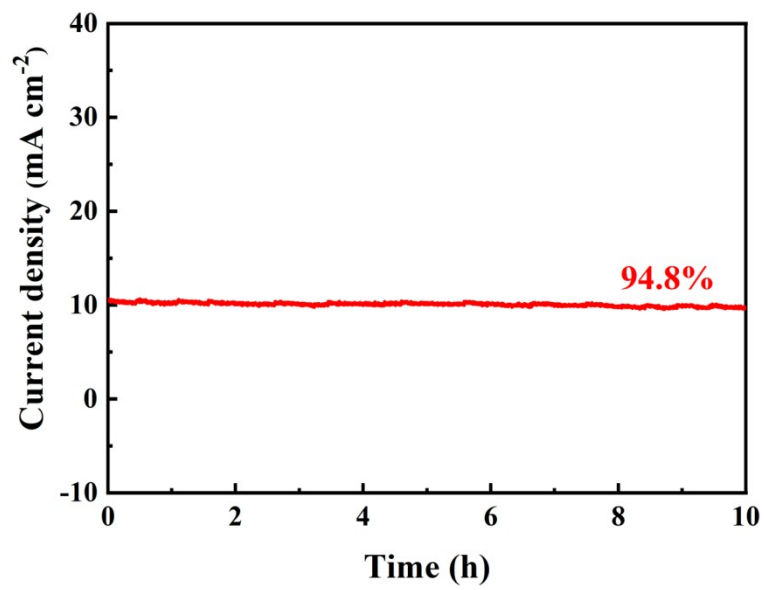

**Figure S13.** The stability evaluation of Ir-pZCO after 10 hours.

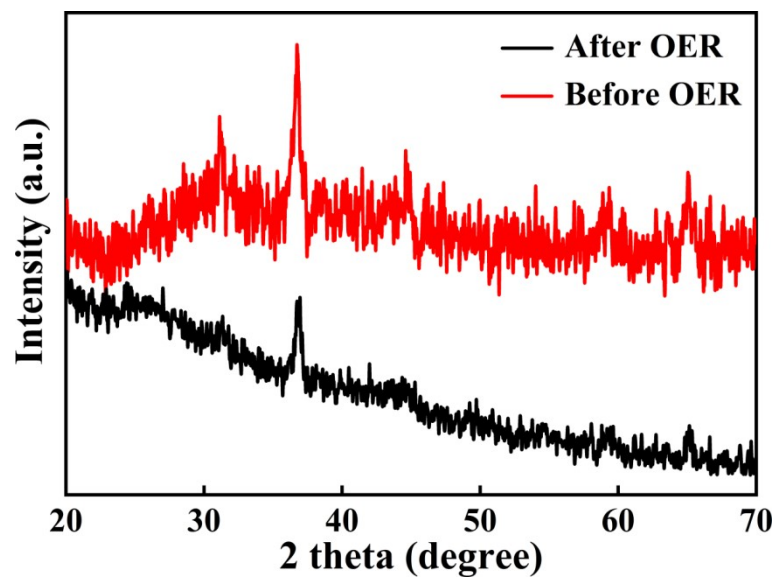

**Figure S14.** The PXRD patterns of Ir-pZCO before/after the 10-hour OER test.

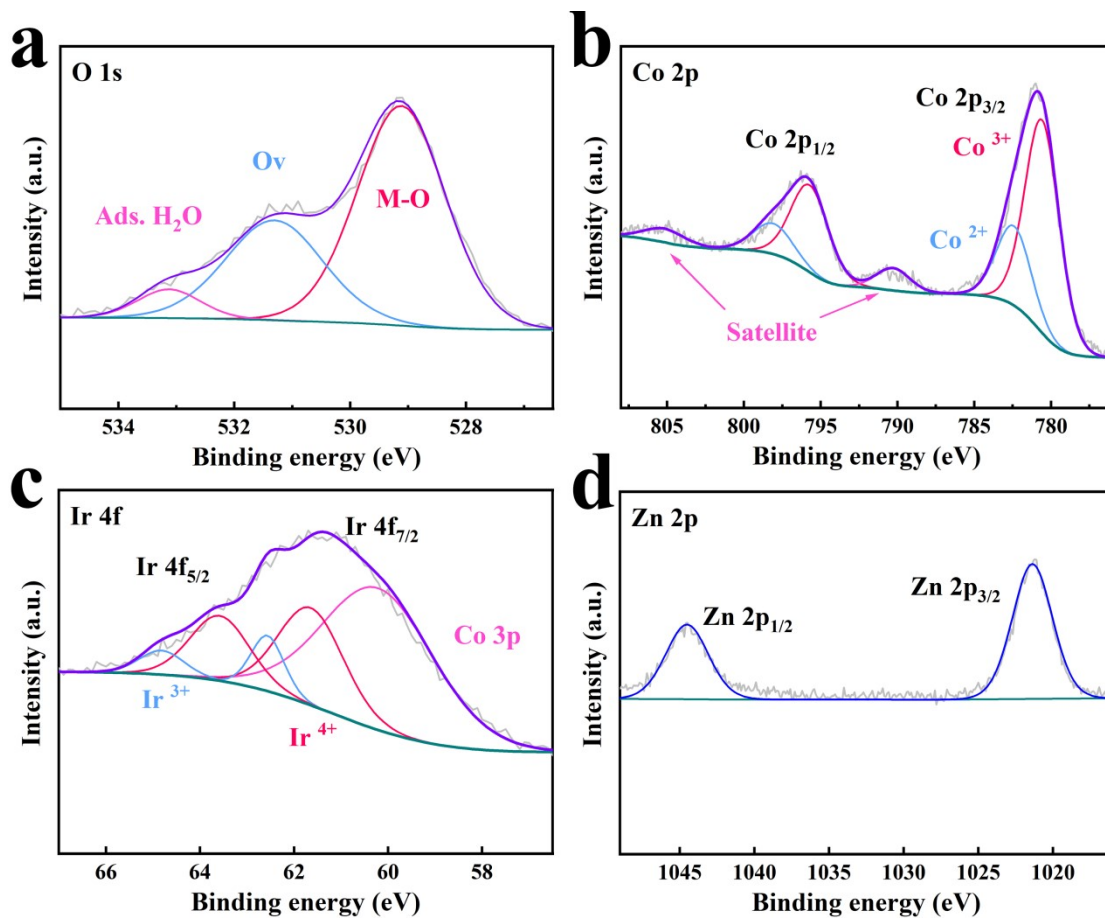

**Figure S15.** The deconvoluted XPS spectra of Ir-pZCO after OER test.

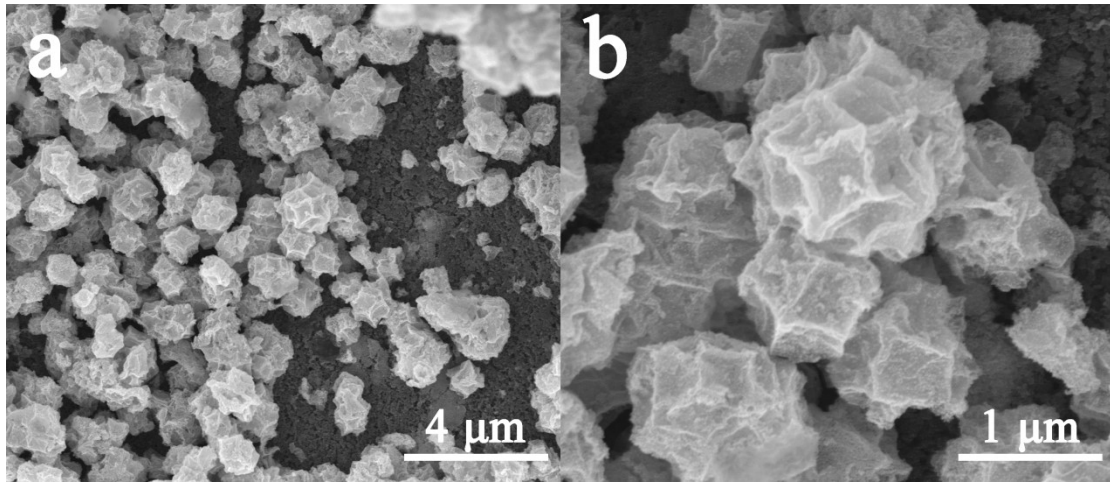

**Figure S16.** The SEM images of Ir-pZCO after OER.

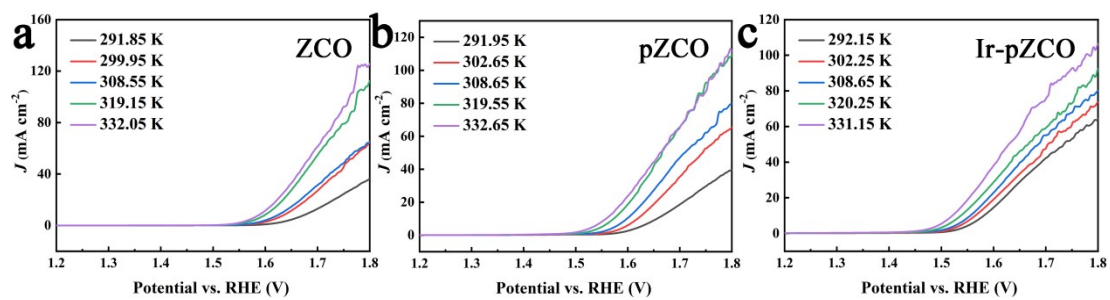

**Figure S17.** Temperature-dependent LSV curves of (a) ZCO, (b) pZCO, and (c) Ir-pZCO measured in 1.0 M KOH with a sweep rate of 5 mV s<sup>-1</sup>.



**Table S1. Summary of Crystal Data and Refinement Results for ZIF-8.**

| <b>Compound</b>                         | <b>ZIF-8<sup>Ref. 3</sup></b>                                  |
|-----------------------------------------|----------------------------------------------------------------|
| <b>Chemical formula</b>                 | C <sub>18</sub> H <sub>8</sub> Co <sub>2</sub> O <sub>12</sub> |
| <b>Formula mass</b>                     | 746.7                                                          |
| <b>Crystal system</b>                   | Cubic                                                          |
| <b>Space group</b>                      | <i>I</i> -43m                                                  |
| <b>a (Å)</b>                            | 16.993(2)                                                      |
| <b>b (Å)</b>                            | 16.993(2)                                                      |
| <b>c (Å)</b>                            | 16.993(2)                                                      |
| <b>α (°)</b>                            | 90                                                             |
| <b>β (°)</b>                            | 90                                                             |
| <b>γ (°)</b>                            | 90                                                             |
| <b>Unit cell volume (Å<sup>3</sup>)</b> | 4906.8(10)                                                     |
| <b>Temperature (K)</b>                  | 240(2)                                                         |
| <b>Z</b>                                | 4                                                              |
| <b>R<sub>1</sub> (I&gt;2σ(I))</b>       | 0.0510                                                         |
| <b>wR (all reflections)</b>             | 0.1424                                                         |

**Ref. 3.**<sup>3</sup> W. Morris, C. J. Stevens, R. E. Taylor, C. Dybowski, O. M. Yaghi, M. A. Garcia-Garibay. NMR and X-ray Study Revealing the Rigidity of Zeolitic Imidazolate Frameworks. *J. Phys. Chem. C.*, **2012**, 116, 13307-13312.

**Table S2. Summary of Crystal Data and Refinement Results for ZIF-67.**

| <b>Compound</b>                         | <b>ZIF-67<sup>Ref. 4</sup></b>                                                 |
|-----------------------------------------|--------------------------------------------------------------------------------|
| <b>Chemical formula</b>                 | C <sub>24</sub> H <sub>30</sub> N <sub>12</sub> O <sub>2</sub> Co <sub>3</sub> |
| <b>Crystal system</b>                   | Cubic                                                                          |
| <b>Space group</b>                      | <i>I</i> -43m                                                                  |
| <b>a (Å)</b>                            | 16.959(3)                                                                      |
| <b>b (Å)</b>                            | 16.959(3)                                                                      |
| <b>c (Å)</b>                            | 16.959(3)                                                                      |
| <b>α (°)</b>                            | 90                                                                             |
| <b>β(°)</b>                             | 90                                                                             |
| <b>γ(°)</b>                             | 90                                                                             |
| <b>Unit cell volume (Å<sup>3</sup>)</b> | 4877.45(15)                                                                    |
| <b>Temperature (K)</b>                  | 153(2)                                                                         |
| <b>Z</b>                                | 4                                                                              |
| <b>R<sub>1</sub> (I&gt;2σ(I))</b>       | 0.0724                                                                         |
| <b>wR (all reflections)</b>             | 0.2152                                                                         |

**Ref. 4<sup>4</sup>**. R. Banerjee, A. Phan, B. Wang, C. Knobler, H. Furukawa, M. O’Keeffe, O. M. Yaghi. High-Throughput Synthesis of Zeolitic Imidazolate Frameworks and Application to CO<sub>2</sub> Capture. *Science*, **2008**, 319, 939-943.

**Table S3. The Content of Ir in Ir-pZCO by ICP-OES Measurement.**

| <b>Element</b>  | <b>Ir</b> |
|-----------------|-----------|
| <b>Weight %</b> | 5.67%     |

**Table S4. Summary of Pore Characteristics of pCO, pZCO-1, pZCO-2, pZCO-3, pZCO-4.**

| <b>Samples</b> | <b>Surface area/m<sup>2</sup> g<sup>-1</sup><br/>(BET)</b> | <b>Total pore<br/>volume<sup>a</sup><br/>/cm<sup>3</sup> g<sup>-1</sup></b> | <b>Micropore<br/>volume<sup>b</sup><br/>/cm<sup>3</sup> g<sup>-1</sup></b> |
|----------------|------------------------------------------------------------|-----------------------------------------------------------------------------|----------------------------------------------------------------------------|
| <b>pCO</b>     | 25.8863                                                    | 0.3042                                                                      | 0.0098                                                                     |
| <b>pZCO-1</b>  | 38.4393                                                    | 0.3211                                                                      | 0.0160                                                                     |
| <b>pZCO-2</b>  | 65.8773                                                    | 0.4956                                                                      | 0.0272                                                                     |
| <b>pZCO-3</b>  | 147.3986                                                   | 0.8845                                                                      | 0.0565                                                                     |
| <b>pZCO-4</b>  | 35.1534                                                    | 0.3300                                                                      | 0.0153                                                                     |

a At P/P0=0.99.

b Determined by NLDFIT method.

**Table S5. Elemental Analyses Based on EDS Results of Ir-pZCO.**

| C (%) |      | N (%) |       | O (%) |       | Zn (%) |      | Co (%) |      | Ir (%) |      |
|-------|------|-------|-------|-------|-------|--------|------|--------|------|--------|------|
| Wt.   | At.  | Wt.   | At.   | Wt.   | At.   | Wt.    | At.  | Wt.    | At.  | Wt.    | At.  |
| 6.81  | 9.65 | 19.96 | 24.27 | 58.39 | 62.16 | 3.51   | 0.91 | 9.99   | 2.89 | 1.35   | 0.12 |

**Table S6. Deconvoluted Peak Position of O 1s in ZCO, pZCO, Ir-pZCO.**

| Sample  | M-O       | O <sub>v</sub> | Ads. H <sub>2</sub> O |
|---------|-----------|----------------|-----------------------|
| ZCO     | 529.44 eV | 531.61 eV      | 533.61 eV             |
| pZCO    | 529.44 eV | 531.61 eV      | 533.61 eV             |
| Ir-pZCO | 529.44 eV | 531.52 eV      | 533.63 eV             |

**Table S7. Deconvoluted Peak Position of Co 2p in ZCO, pZCO, Ir-pZCO.**

| Sample  | Co <sup>3+</sup> 2p <sub>3/2</sub> | Co <sup>2+</sup> 2p <sub>3/2</sub> | Co <sup>3+</sup> 2p <sub>1/2</sub> | Co <sup>2+</sup> 2p <sub>1/2</sub> |
|---------|------------------------------------|------------------------------------|------------------------------------|------------------------------------|
| ZCO     | 779.69 eV                          | 781.59 eV                          | 794.69 eV                          | 796.70 eV                          |
| pZCO    | 779.69 eV                          | 781.59 eV                          | 794.69 eV                          | 796.70 eV                          |
| Ir-pZCO | 780.09 eV                          | 781.99 eV                          | 795.09 eV                          | 797.10 eV                          |

**Table S8. The Summary Electrochemical Data of ZCO, pZCO, Ir-pZCO and RuO<sub>2</sub>.**

| Sample           | Overpotential<br>(mV, $\eta_{10}$ ) | Tafel<br>slope<br>(mV dec <sup>-1</sup> ) | C <sub>dl</sub> value<br>(mF cm <sup>-2</sup> ) | Electron<br>number<br>(average) | charge transfer<br>resistance ( $\Omega$ ) |
|------------------|-------------------------------------|-------------------------------------------|-------------------------------------------------|---------------------------------|--------------------------------------------|
| ZCO              | 466                                 | 96.1                                      | 0.29                                            | 3.9725                          | 132.9                                      |
| pZCO             | 407                                 | 73.6                                      | 0.99                                            | 3.9510                          | 15.1                                       |
| Ir-<br>pZCO      | 304                                 | 63.9                                      | 1.93                                            | 4.0017                          | 6.4                                        |
| RuO <sub>2</sub> | 346                                 | 69.8                                      | /                                               | 4.0033                          | 4.4                                        |



**Table S9. The Activation Energies of ZCO, pZCO, and Ir-pZCO at Different Overpotentials.**

| Sample  | EOER a (300<br>mV)         | EOER a (350<br>mV)         | EOER a (400<br>mV)         | EOER a (450<br>mV)         |
|---------|----------------------------|----------------------------|----------------------------|----------------------------|
| ZCO     | 78.33 kJ mol <sup>-1</sup> | 78.17 kJ mol <sup>-1</sup> | 60.21 kJ mol <sup>-1</sup> | 43.56 kJ mol <sup>-1</sup> |
| pZCO    | 73.11 kJ mol <sup>-1</sup> | 69.91 kJ mol <sup>-1</sup> | 47.82 kJ mol <sup>-1</sup> | 35.44 kJ mol <sup>-1</sup> |
| Ir-pZCO | 57.14 kJ mol <sup>-1</sup> | 35.41 kJ mol <sup>-1</sup> | 23.89 kJ mol <sup>-1</sup> | 17.85 kJ mol <sup>-1</sup> |

**Table S10. Comparison of Various OER Electrocatalysts in Alkaline Solution.**

| Samples                                              | Electrolyte | $\eta_{10}$ /mV | Tafel slope /mV dec <sup>-1</sup> | Ref.             |
|------------------------------------------------------|-------------|-----------------|-----------------------------------|------------------|
| <b>Ir-pZCO</b>                                       | 1.0 M KOH   | 304             | 63.9                              | <b>This work</b> |
| <b>CoO<sub>x</sub>-ZIF</b>                           | 1.0 M KOH   | 321             | 70.3                              | 5                |
| <b>P'1-Co<sub>3</sub>O<sub>4</sub></b>               | 1.0 M KOH   | 320             | 54                                | 6                |
| <b>Fe-Co<sub>3</sub>O<sub>4</sub></b>                | 1.0 M KOH   | 384             | 62.9                              | 7                |
| <b>Co<sub>3</sub>O<sub>4</sub>-NP-Cube</b>           | 1.0 M KOH   | 390             | 50                                | 8                |
| <b>Fractal Co<sub>3</sub>O<sub>4</sub></b>           | 1.0 M KOH   | 347             | 40                                | 9                |
| <b>Co-Co<sub>3</sub>O<sub>4</sub>/NC</b>             | 0.1 M KOH   | 390             | 65.6                              | 10               |
| <b>Co<sub>3</sub>O<sub>4</sub>/Co@NCs</b>            | 1.0 M KOH   | 323             | 76.4                              | 11               |
| <b>Ir<sub>0.33</sub>@Co<sub>3</sub>O<sub>4</sub></b> | 1.0 M KOH   | 296             | 68                                | 12               |
| <b>10-Ir-NCO</b>                                     | 1.0 M KOH   | 303             | 78                                | 13               |
| <b>Ir-Co<sub>3</sub>O<sub>4</sub>@NC</b>             | 1.0 M KOH   | 296             | 89                                | 14               |

## References

1. K. Momma and F. Izumi , VESTA 3 for three-dimensional visualization of crystal, volumetric and morphology data, *J. Appl. Cryst.*, 2011, **44** , 1272-1276.
2. J. Cao , X. Zhang , S. Zhao , X. Lu and H. Ma , Mechanism of the two-dimensional WSeTe/Zr<sub>2</sub>CO<sub>2</sub> direct Z-scheme van der Waals heterojunction as a photocatalyst for water splitting, *Phys. Chem. Chem. Phys.*, 2022, **24** , 21030-21039.
3. W. Morris , C. J. Stevens , R. E. Taylor , C. Dybowski , O. M. Yaghi and M. A. Garcia-Garibay , NMR and X-ray study revealing the rigidity of zeolitic imidazolate frameworks, *J. Phys. Chem. C*, 2012, **116** , 13307-13312.
4. R. Banerjee , A. Phan , B. Wang , C. Knobler , H. Furukawa , M. O'Keeffe and O. M. Yaghi , High-throughput synthesis of zeolitic imidazolate frameworks and application to CO<sub>2</sub> capture, *Science*, 2008, **319** , 939-943.
5. S. Dou , C.-L. Dong , Z. Hu , Y.-C. Huang , J.-l. Chen , L. Tao , D. Yan , D. Chen , S. Shen , S. Chou and S. Wang , Atomic-scale CoO<sub>x</sub> species in metal-organic frameworks for oxygen evolution reaction, *Adv. Funct. Mater.*, 2017, **27** , 1702546.
6. X. Zhou , X. Liao , X. Pan , M. Yan , L. He , P. Wu , Y. Zhao , W. Luo and L. Mai , Unveiling the role of surface P-O group in P-doped Co<sub>3</sub>O<sub>4</sub> for electrocatalytic oxygen evolution by On-chip micro-device, *Nano Energy*, 2021, **83** , 105748.
7. X. Wu , Z. Shao , Q. Zhu , X. Hou , C. Wang , J. Zeng , K. Huang and S. Feng , Tuning the d-Band center of Co<sub>3</sub>O<sub>4</sub> via octahedral and tetrahedral codoping for oxygen evolution reaction, *ACS Catal.*, 2024, **14** , 5888-5897.
8. Z. Liu , H. M. A. Amin , Y. Peng , M. Corva , R. Pentcheva and K. Tschulik , Facet-dependent intrinsic activity of single Co<sub>3</sub>O<sub>4</sub> nanoparticles for oxygen evolution reaction, *Adv. Funct. Mater.*, 2023, **33** , 2210945.
9. T. Tran-Phu , R. Daiyan , J. Leverett , Z. Fusco , A. Tadich , I. Di Bernardo , A. Kiy , T. N. Truong , Q. Zhang , H. Chen , P. Kluth , R. Amal and A. Tricoli , Understanding the activity and stability of flame-made Co<sub>3</sub>O<sub>4</sub> spinels: A route towards the scalable production of highly performing OER electrocatalysts, *Chem. Eng. J.*, 2022, **429** , 132180.
10. A. K. U , A. Sethi , R. M. Lawrence and V. M. Dhavale , Co-Co<sub>3</sub>O<sub>4</sub> nanostructure with nitrogen-doped carbon as bifunctional catalyst for oxygen electrocatalysis, *Int. J. Hydrogen Energy*, 2021, **46** , 34701-34712.
11. N.-F. Yu , C. Wu , W. Huang , Y.-H. Chen , D.-Q. Ruan , K.-L. Bao , H. Chen , Y. Zhang , Y. Zhu , Q.-H. Huang , W.-H. Lai , Y.-X. Wang , H.-G. Liao , S.-G. Sun , Y.-P. Wu and J. Wang , Highly efficient Co<sub>3</sub>O<sub>4</sub>/Co@NCs bifunctional oxygen electrocatalysts for long life rechargeable Zn-air batteries, *Nano Energy*, 2020, **77** , 105200.
12. H. Chen , S. Chen , Z. Zhang , L. Sheng , J. Zhao , W. Fu , S. Xi , R. Si , L. Wang , M. Fan and B. Yang , Single-atom-induced adsorption optimization of adjacent sites boosted oxygen evolution reaction, *ACS Catal.*, 2022, **12** , 13482-13491.
13. H.-J. Lee , D.-H. Park , W.-J. Lee , S.-B. Han , M.-H. Kim , J.-H. Byeon and K.-W. Park , Mesoporous spinel Ir-doped NiCo<sub>2</sub>O<sub>4</sub> nanostructure as an efficient catalyst for oxygen evolution reaction, *Appl. Catal. A-Gen.*, 2021, **626** , 118377.

14. S. Jung , R. A. Senthil , C. J. Moon , N. Tarasenko , A. Min , S. J. Lee , N. Tarasenko and M. Y. Choi , Mechanistic insights into ZIF-67-derived Ir-doped Co<sub>3</sub>O<sub>4</sub>@N-doped carbon hybrids as efficient electrocatalysts for overall water splitting using in situ Raman spectroscopy, *Chem. Eng. J.*, 2023, **468** , 143717.
